# Supplementary material
Source: Springer Nature journal article supplement (http://www.springermedizin.de/resource/supplementary/13195_2014_222_MOESM5_ESM.pdf/9688532)

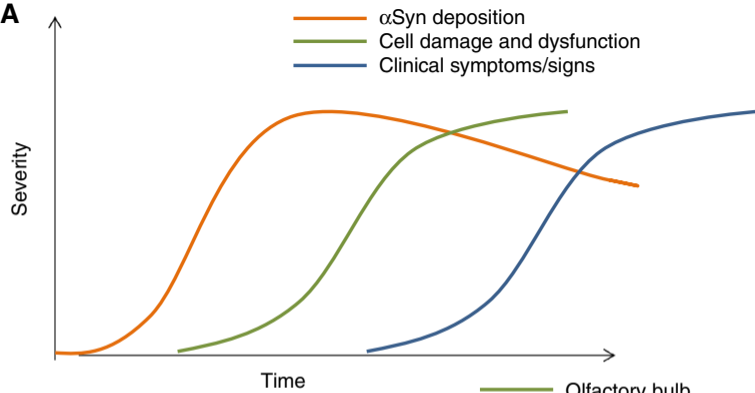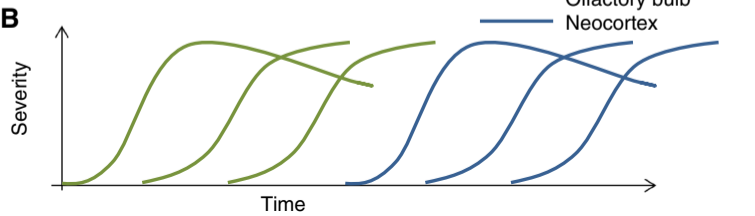

Supplement: MOESM5 [file 9688532]
